# Supplementary material for: Inherent regulatory asymmetry emanating from network architecture in a prevalent autoregulatory motif
Source: eLife. 2020 Aug 18;9:e56517. doi: 10.7554/eLife.56517 (PMC7505660; doi:10.7554/eLife.56517)
Supplement: Figure 3—source data 1. — The fold-change values listed here correspond to the values plotted in Figure 3D. Data presented here is a bootstrapped mean of fold-change in TF and target expression across hundreds of cells with a given number of competing binding sites and error bars represent the standard deviation of the bootstrapped mean. [file elife-56517-fig3-data1.xlsx]

## Sheet: Sheet1
AO1TOid (Trial 1)	Fold change in mCherry	Fold change in YFP	std of mcherry	std of YFP
No decoy	0.017386	0.014677	0.000450175	0.000750331
1X decoy	0.0564253	0.0515953	0.00100939	0.00194508
2X decoy	0.0966039	0.0901378	0.00159488	0.00255895
3X decoy	0.138293	0.117225	0.00229599	0.00385224
4X decoy	0.176535	0.157946	0.00308554	0.0045231
AO1TOid (Trial 2)	Fold change in mCherry	Fold change in YFP	std of mcherry	std of YFP
No decoy	0.0253851	0.0145849	0.000862714	0.000860406
1X decoy	0.0715679	0.0449553	0.00167342	0.00230693
2X decoy	0.116869	0.0713521	0.00222211	0.00355188
3X decoy	0.168325	0.111263	0.00358978	0.00531503
4X decoy	0.206303	0.151017	0.00481729	0.00696131
AO1TO2 (Trial 1)	Fold change in mCherry	Fold change in YFP	std of mcherry	std of YFP
No decoy	0.0249963	0.211677	0.000448991	0.0041143
1X decoy	0.0722217	0.433401	0.00148448	0.0101239
2X decoy	0.115424	0.599014	0.00131512	0.00805578
3X decoy	0.143245	0.684417	0.00334181	0.0144915
4X decoy	0.175733	0.757876	0.00248679	0.0116327
AO1TO2 (Trial 2)	Fold change in mCherry	Fold change in YFP	std of mcherry	std of YFP
No decoy	0.0168688	0.211635	0.000738848	0.00646294
1X decoy	0.0686023	0.449132	0.00117796	0.00847421
2X decoy	0.10496	0.593647	0.00222924	0.0134608
3X decoy	0.138763	0.654668	0.00363901	0.01744
4X decoy	0.164781	0.763726	0.0036843	0.0170836
AO1TO1 (Trial 1)	Fold change in mCherry	Fold change in YFP	std of mcherry	std of YFP
No decoy	0.0171311	0.036088	0.00041651	0.00114311
1X decoy	0.0458672	0.0960389	0.000928753	0.00278328
2X decoy	0.0762703	0.160705	0.00171451	0.00512249
3X decoy	0.107744	0.21917	0.00224519	0.00488716
4X decoy	0.139678	0.263256	0.00265551	0.0055491
AO1TO1 (Trial 2)	Fold change in mCherry	Fold change in YFP	std of mcherry	std of YFP
No decoy	0.0159313	0.0381912	0.00036462	0.00137178
1X decoy	0.0530935	0.110845	0.00112375	0.00320388
2X decoy	0.0872219	0.157966	0.00228237	0.00499561
3X decoy	0.121531	0.208835	0.00241054	0.00491438
4X decoy	0.158608	0.300206	0.00606507	0.0139734
