# Supplementary material for: Inherent regulatory asymmetry emanating from network architecture in a prevalent autoregulatory motif
Source: eLife. 2020 Aug 18;9:e56517. doi: 10.7554/eLife.56517 (PMC7505660; doi:10.7554/eLife.56517)
Supplement: Figure 4—source data 1. — The fold-change values listed here correspond to the values plotted in Figure 4F. Fold-change is calculated for TF and target genes in each individual cell and binned according to the fold-change in TF gene. Mean values presented here is the bootstrapped mean of all cells that fall within a given bin. Standard deviation corresponds to the error in the bootstrapped mean of a given bin. [file elife-56517-fig4-data1.xlsx]

## Sheet: Sheet1
Tag: No tag (Trial 1)
Foldchange in mCherry (mean of datapoints in bin)	0.0122687	0.0249531	0.0409553	0.0552889	0.070017	0.0847931	0.0994286	0.113168	0.128769	0.143249	0.156713
Foldchange in YFP (mean of datapoints in bin)	0.0352401	0.0549196	0.087754	0.114739	0.159654	0.180833	0.20676	0.230325	0.266084	0.279807	0.306543
standard deviation for mcherry	0.000275867	0.000609948	0.000383617	0.000363885	0.000364015	0.00035707	0.000369682	0.000381229	0.000490641	0.000721464	0.000786921
standard deviation for YFP	0.00208418	0.0046232	0.00333725	0.00379213	0.0047455	0.00543298	0.00604375	0.00759014	0.00983607	0.019308	0.0142294
Tag: No tag (Trial 2)
Foldchange in mCherry (mean of datapoints in bin)	0.013794	0.035452	0.0559395	0.0745712	0.0947945	0.116386	0.138064	0.155901
Foldchange in YFP (mean of datapoints in bin)	0.0325061	0.0692819	0.112271	0.131102	0.179558	0.225073	0.247658	0.26993
standard deviation for mcherry	0.000406222	0.000771109	0.000616526	0.000834923	0.000940623	0.000917716	0.000847475	0.00114734
standard deviation for YFP	0.00150157	0.00496145	0.00471689	0.00634677	0.00812609	0.00941504	0.0121815	0.0167233
Tag: No tag (Trial 3)
Foldchange in mCherry (mean of datapoints in bin)	0.0132527	0.0310461	0.0475145	0.0639655	0.0821715	0.100557	0.116679	0.134279	0.152924	0.169516	0.186053
Foldchange in YFP (mean of datapoints in bin)	0.0302008	0.0616306	0.088427	0.129055	0.151586	0.182698	0.201233	0.228967	0.259529	0.256857	0.297743
standard deviation for mcherry	0.000318159	0.000445231	0.000403106	0.000537689	0.000510051	0.000434235	0.000416009	0.000412844	0.000469385	0.000581748	0.000734838
standard deviation for YFP	0.00127673	0.00249258	0.00285512	0.00527581	0.00512956	0.00554852	0.00531378	0.00547951	0.00798209	0.00829037	0.0131083
Tag: No tag (Trial 4)
Foldchange in mCherry (mean of datapoints in bin)	0.0325481	0.0455943	0.0621665	0.0780686	0.0937388	0.10901	0.124625	0.140605	0.155375	0.170259	0.187972
Foldchange in YFP (mean of datapoints in bin)	0.0914589	0.106463	0.151727	0.18055	0.210826	0.234833	0.260708	0.288965	0.303315	0.354735	0.335071
standard deviation for mcherry	0.000566646	0.000403869	0.00043724	0.000351504	0.000278458	0.00030545	0.000326184	0.000346842	0.000464883	0.000534768	0.000802174
standard deviation for YFP	0.00403798	0.00369002	0.00614482	0.00555209	0.00426307	0.00532112	0.00543414	0.00766278	0.00847717	0.0157323	0.0186373
Tag: DAS tag (Trial 1)
Foldchange in mCherry (mean of datapoints in bin)	0	-0.0108779	-0.00131272	0.00784612	0.0161755	0.0253321	0.0340245	0.0433679	0.0520607
Foldchange in YFP (mean of datapoints in bin)	0	0.0840767	0.096162	0.0815596	0.104235	0.151944	0.223801	0.295466	0.352966
standard deviation for mcherry	0	0.000418822	0.000334894	0.000200685	0.000169797	0.000149076	0.000147006	0.000150962	0.000176763
standard deviation for YFP	0	0.0176729	0.0113372	0.00655222	0.00548787	0.00629925	0.00564766	0.00633105	0.00829427
Tag: DAS tag (Trial 2)
Foldchange in mCherry (mean of datapoints in bin)	0	0.0011832	0.00984133	0.0199593	0.028775	0.0389471	0.0480705	0.0574599	0.0669443
Foldchange in YFP (mean of datapoints in bin)	0	0.126036	0.109709	0.136336	0.183529	0.255075	0.312638	0.369014	0.416198
standard deviation for mcherry	0	0.000358628	0.000263875	0.000201451	0.000182003	0.000175695	0.000183614	0.000230443	0.000286006
standard deviation for YFP	0	0.0158614	0.00740334	0.00722568	0.00549546	0.00592099	0.00580461	0.0067679	0.00882639
Tag: DAS tag (Trial 3)
Foldchange in mCherry (mean of datapoints in bin)	0	-0.0174152	0.00115011	0.0192274	0.0363777	0.0551055	0.0739226	0.0930847	0.111623
Foldchange in YFP (mean of datapoints in bin)	0	0.152629	0.142371	0.161593	0.249085	0.366151	0.480861	0.598681	0.70086
standard deviation for mcherry	0	0.000584017	0.000320665	0.000208731	0.000187702	0.000205296	0.000283877	0.000374669	0.000711337
standard deviation for YFP	0	0.0157048	0.0079029	0.00449736	0.004131	0.00428269	0.00659199	0.00945156	0.0152402
Tag: DAS tag (Trial 4)
Foldchange in mCherry (mean of datapoints in bin)	0	-0.000119415	0.0146682	0.0294575	0.0437303	0.0581421	0.0729977	0.0886007	0.101695	0.118126
Foldchange in YFP (mean of datapoints in bin)	0	0.246692	0.254722	0.293628	0.350533	0.442777	0.522077	0.587785	0.691144	0.754879
standard deviation for mcherry	0	0.000766191	0.000407521	0.000257588	0.000211541	0.000248697	0.000299365	0.000509402	0.000617407	0.000761974
standard deviation for YFP	0	0.0333339	0.0120516	0.0073524	0.00504519	0.00585632	0.00851803	0.0155579	0.0255439	0.0299685
Tag: DAS+4 tag (Trial 1)
Foldchange in mCherry (mean of datapoints in bin)	0	0.0176647	0.0479642	0.0801396	0.125654	0.160619	0.196929	0.233786	0.271353	0.307723	0.346714
Foldchange in YFP (mean of datapoints in bin)	0	0.0602852	0.0752089	0.121012	0.246552	0.303019	0.36502	0.410963	0.458788	0.519858	0.567746
standard deviation for mcherry	0	0.00115108	0.000590072	0.000968487	0.000889237	0.000630643	0.000583843	0.000613899	0.000701721	0.000936624	0.00133704
standard deviation for YFP	0	0.00339853	0.00200725	0.00530671	0.00590232	0.00507032	0.00486734	0.00533107	0.00731702	0.0121846	0.0167085
Tag: DAS+4 tag (Trial 2)
Foldchange in mCherry (mean of datapoints in bin)	0	0.0419039	0.0728434	0.115813	0.157155	0.196481	0.234562	0.272813	0.310243	0.349934	0.389405
Foldchange in YFP (mean of datapoints in bin)	0	0.0659189	0.0870067	0.166178	0.261216	0.308019	0.350701	0.403572	0.455295	0.49007	0.544152
standard deviation for mcherry	0	0.000727686	0.000712764	0.0012515	0.00095363	0.000647636	0.000609854	0.000711771	0.000772855	0.000773531	0.00123862
standard deviation for YFP	0	0.00185577	0.00264983	0.00860357	0.00578116	0.00394522	0.00447094	0.00516487	0.00718668	0.00859199	0.0143335
Tag: DAS+4 tag (Trial 3)
Foldchange in mCherry (mean of datapoints in bin)	0	-0.00232129	0.0449588	0.109596	0.166606	0.225355	0.282498	0.343437	0.401127	0.461391
Foldchange in YFP (mean of datapoints in bin)	0	0.0583645	0.09211	0.231806	0.32963	0.410371	0.490867	0.577687	0.670911	0.722962
standard deviation for mcherry	0	0.00227657	0.000950955	0.000966814	0.00071664	0.000733534	0.000804282	0.00109708	0.00182288	0.00219165
standard deviation for YFP	0	0.00376468	0.0037236	0.00575877	0.00463888	0.00538282	0.0069527	0.0102629	0.0192376	0.0251626
Tag: DAS+4 tag (Trial 4)
Foldchange in mCherry (mean of datapoints in bin)	0	0.103741	0.143677	0.183103	0.223488	0.26368	0.306156	0.346701	0.387371	0.426199	0.472835
Foldchange in YFP (mean of datapoints in bin)	0	0.209029	0.242264	0.303474	0.347734	0.39282	0.435048	0.473565	0.513902	0.571625	0.673379
standard deviation for mcherry	0	0.00125818	0.000754251	0.000612765	0.000600841	0.000763676	0.00086822	0.000983364	0.00130321	0.00184045	0.00231015
standard deviation for YFP	0	0.00711682	0.00459053	0.00393695	0.00452513	0.00633588	0.00809549	0.0103571	0.015098	0.0224023	0.0352689
Tag: LAA tag (Trial 1)
Foldchange in mCherry (mean of datapoints in bin)	0	0.0413115	0.164859	0.270109	0.391316	0.502864	0.617692	0.743996	0.860805	0.976739
Foldchange in YFP (mean of datapoints in bin)	0	0.208408	0.267248	0.305022	0.424733	0.513338	0.609927	0.71945	0.816554	0.924024
standard deviation for mcherry	0	0.00602967	0.00347767	0.00266597	0.00212397	0.00211611	0.00248804	0.0028385	0.00390908	0.00544664
standard deviation for YFP	0	0.0229872	0.0190922	0.0109414	0.00682781	0.00764037	0.00887773	0.0131757	0.01709	0.0284394
Tag: LAA tag (Trial 2)
Foldchange in mCherry (mean of datapoints in bin)	0	0.158374	0.270247	0.378515	0.491343	0.610654	0.72387	0.8438
Foldchange in YFP (mean of datapoints in bin)	0	0.298088	0.320535	0.404519	0.490003	0.596084	0.695355	0.770498
standard deviation for mcherry	0	0.00450166	0.00285138	0.00220804	0.00228746	0.00268084	0.00301881	0.00461517
standard deviation for YFP	0	0.018327	0.0119111	0.00799143	0.00743265	0.0103114	0.0112167	0.0198258
Tag: LAA tag (Trial 3)
Foldchange in mCherry (mean of datapoints in bin)	0	0.0710617	0.318025	0.566719	0.830214	1.09947	1.38668
Foldchange in YFP (mean of datapoints in bin)	0	0.24343	0.355664	0.559471	0.765965	1.02408	1.3454
standard deviation for mcherry	0	0.004646	0.00264022	0.00261923	0.00405021	0.00737534	0.0169929
standard deviation for YFP	0	0.0101286	0.00599708	0.00560968	0.00875496	0.019381	0.0474849
Tag: LAA tag (Trial 4)
Foldchange in mCherry (mean of datapoints in bin)	0	0.216424	0.312586	0.408619	0.503226	0.609082	0.700004
Foldchange in YFP (mean of datapoints in bin)	0	0.412663	0.416137	0.470534	0.521616	0.612313	0.690255
standard deviation for mcherry	0	0.00383966	0.0022849	0.00189868	0.00183352	0.00222032	0.00243125
standard deviation for YFP	0	0.0156726	0.00734726	0.00777439	0.0065714	0.0094457	0.0123206
