# Supplementary material for: Inherent regulatory asymmetry emanating from network architecture in a prevalent autoregulatory motif
Source: eLife. 2020 Aug 18;9:e56517. doi: 10.7554/eLife.56517 (PMC7505660; doi:10.7554/eLife.56517)
Supplement: Figure 5—source data 1. — The fold-change values listed here correspond to the values plotted in Figure 5A-C. Fold-change is calculated for TF and target genes in each individual cell and binned according to the fold-change in TF gene. Mean values presented here is the bootstrapped mean of all cells that fall within a given bin. Standard deviation corresponds to the error in the bootstrapped mean of a given bin. [file elife-56517-fig5-data1.xlsx]

## Sheet: O1
Media: RDM (Trial 1)
Foldchange in mCherry (mean of datapoints in bin)	0.011023	0.0261126	0.0404054	0.0597118	0.0763376	0.0953275	0.1122	0.129621	0.147004	0.165145	0.181159	0.199825	0.218073	0.235319
Foldchange in YFP (mean of datapoints in bin)	0.0517898	0.0546372	0.0752348	0.11752	0.172868	0.205927	0.234487	0.255503	0.291549	0.317774	0.342577	0.360327	0.382231	0.41012
standard deviation for mcherry	0.000920256	0.000442649	0.000577875	0.00055915	0.000665517	0.00054155	0.000499917	0.00049504	0.000456665	0.000434045	0.000593446	0.0006174	0.000757771	0.000821641
standard deviation for YFP	0.00473782	0.00239582	0.0035426	0.00464987	0.00783782	0.00584519	0.00642612	0.00587872	0.00638989	0.00682131	0.00890195	0.00990603	0.0119366	0.0172491
Media: RDM (Trial 2)
Foldchange in mCherry (mean of datapoints in bin)	0	0.0266863	0.0392091	0.0539078	0.0689344	0.0822343	0.097306	0.111773	0.125744	0.140243	0.15503	0.16911	0.18382	0.19876	0.213069
Foldchange in YFP (mean of datapoints in bin)	0	0.0604785	0.0870264	0.115377	0.14393	0.174286	0.198457	0.231659	0.257633	0.284027	0.302344	0.328622	0.357361	0.385986	0.376808
standard deviation for mcherry	0	0.000416745	0.000432127	0.000783353	0.000588167	0.00053562	0.000551969	0.000551855	0.000507463	0.000443794	0.000433235	0.000365711	0.00065713	0.000616948	0.00086354
standard deviation for YFP	0	0.00332328	0.00400662	0.00823069	0.00653753	0.00664288	0.00733904	0.00770511	0.00762736	0.00638635	0.0084171	0.00840074	0.0108276	0.0152091	0.0180404
Media: RDM (Trial 3)
Foldchange in mCherry (mean of datapoints in bin)	0	0.0302485	0.0471112	0.065174	0.0826197	0.0998821	0.116508	0.134282	0.151103	0.167164	0.185762
Foldchange in YFP (mean of datapoints in bin)	0	0.0693507	0.0942704	0.130609	0.182235	0.204634	0.213406	0.279227	0.304954	0.344066	0.349216
standard deviation for mcherry	0	0.000615498	0.000861262	0.000975048	0.00079457	0.000756635	0.000680696	0.000563111	0.000688358	0.000771976	0.00100754
standard deviation for YFP	0	0.00456577	0.00750924	0.00838141	0.0090481	0.00906272	0.0107859	0.0102742	0.0110111	0.012996	0.018781
Media: M9 Glucose (Trial 1)
Foldchange in mCherry (mean of datapoints in bin)	0.0148104	0.0303372	0.0514319	0.0712	0.092663	0.111645	0.132302	0.151295	0.170831	0.189542	0.211977	0.231682
Foldchange in YFP (mean of datapoints in bin)	0.0415718	0.0691437	0.112489	0.14992	0.202231	0.235426	0.284387	0.299177	0.334754	0.352381	0.376308	0.419081
standard deviation for mcherry	0.00039881	0.000764312	0.000581747	0.000680813	0.000739442	0.000567785	0.000563156	0.000569557	0.000599948	0.000596889	0.00071901	0.000870501
standard deviation for YFP	0.00172368	0.00449648	0.00503246	0.00680193	0.00874238	0.00719408	0.00887783	0.00850845	0.0118173	0.0113211	0.0147891	0.0172094
Media: M9 Glucose (Trial 2)
Foldchange in mCherry (mean of datapoints in bin)	0.0152132	0.0363345	0.0544944	0.0764286	0.0962183	0.114746	0.134612	0.154465	0.174572
Foldchange in YFP (mean of datapoints in bin)	0.037053	0.0869245	0.123664	0.180227	0.205627	0.225223	0.255938	0.285816	0.316496
standard deviation for mcherry	0.000515277	0.000685087	0.000739148	0.000598129	0.000598039	0.000553122	0.000546053	0.000710092	0.000812962
standard deviation for YFP	0.00233128	0.00467735	0.00618769	0.00645375	0.00645669	0.00539695	0.00842617	0.00958598	0.0131412
Media: M9 Glucose (Trial 3)
Foldchange in mCherry (mean of datapoints in bin)	0.0141845	0.038738	0.056349	0.0820196	0.105382	0.127422	0.150388	0.173373	0.196129	0.219219
Foldchange in YFP (mean of datapoints in bin)	0.0390655	0.0975455	0.135288	0.194152	0.270789	0.298257	0.332597	0.374083	0.409483	0.404194
standard deviation for mcherry	0.000580689	0.000589015	0.000771042	0.000878562	0.000802744	0.000726117	0.000728085	0.000754552	0.000968993	0.00103694
standard deviation for YFP	0.00289972	0.00484903	0.00782342	0.00889092	0.0122531	0.0113118	0.0117825	0.0145577	0.0169573	0.0168588
Media: M9 Glycerol (Trial 1)
Foldchange in mCherry (mean of datapoints in bin)	0.0184312	0.0376174	0.0668033	0.0889098	0.116383	0.141091	0.164807	0.190572	0.216824	0.240356	0.265604	0.29088
Foldchange in YFP (mean of datapoints in bin)	0.0342286	0.0534463	0.0955197	0.129694	0.167258	0.185971	0.235185	0.253025	0.302595	0.352418	0.361849	0.419634
standard deviation for mcherry	0.000357011	0.00102171	0.000694643	0.000737853	0.000651902	0.00059076	0.000618257	0.000703596	0.000917217	0.00124087	0.00108864	0.00118766
standard deviation for YFP	0.00157989	0.00526012	0.00443968	0.0064316	0.0086481	0.00604843	0.0121147	0.0106945	0.0131491	0.0245622	0.0249639	0.0313352
Media: M9 Glycerol (Trial 2)
Foldchange in mCherry (mean of datapoints in bin)	0.0168072	0.0282178	0.0482395	0.0629496	0.0771674	0.0921395	0.109319	0.125194	0.138179	0.15451	0.169701	0.185626	0.201914	0.217356
Foldchange in YFP (mean of datapoints in bin)	0.0392557	0.051349	0.0772714	0.0900127	0.109126	0.135012	0.19816	0.205182	0.240937	0.224908	0.237184	0.248349	0.275674	0.302219
standard deviation for mcherry	0.000354094	0.000658938	0.000788081	0.000440963	0.000484599	0.000629873	0.000535789	0.000541248	0.000486507	0.000429483	0.000499987	0.000668096	0.000602888	0.000823109
standard deviation for YFP	0.00303181	0.00602964	0.00609776	0.00529106	0.00820602	0.0117083	0.0139772	0.014497	0.0155083	0.0105694	0.0125075	0.0121855	0.0194973	0.0186616
Media: M9 Glycerol (Trial 3)
Foldchange in mCherry (mean of datapoints in bin)	0.0136809	0.0258741	0.0487739	0.0656927	0.0841448	0.102291	0.119623	0.137275	0.155331	0.172537	0.19031	0.208057	0.226638	0.244372
Foldchange in YFP (mean of datapoints in bin)	0.0306283	0.0442511	0.0865602	0.107805	0.122704	0.144451	0.161132	0.185522	0.201716	0.233831	0.258814	0.288074	0.298247	0.325897
standard deviation for mcherry	0.000133988	0.000312511	0.000336034	0.000295866	0.000277727	0.000232544	0.00019775	0.000209319	0.000215044	0.000261892	0.000306786	0.000458859	0.000603986	0.000734923
standard deviation for YFP	0.000741301	0.00218722	0.00297133	0.00269248	0.00328515	0.00281933	0.00247709	0.00291166	0.00321069	0.00445109	0.00706431	0.00979654	0.0158937	0.0204016
Media: M9 Acetate (Trial 1)
Foldchange in mCherry (mean of datapoints in bin)	0.0228847	0.0346103	0	0.073599	0.0877037	0.104982	0.123683	0.140362	0.15649	0.173955	0.190638	0.20726	0.223246	0.241556	0.259191
Foldchange in YFP (mean of datapoints in bin)	0.0379059	0.0488299	0	0.0775935	0.0916463	0.109068	0.133736	0.135278	0.149395	0.16659	0.181143	0.189361	0.20675	0.243726	0.21562
standard deviation for mcherry	0.000374246	0.000385802	0	0.000822545	0.000778301	0.000737044	0.000575023	0.000405312	0.000416069	0.000426751	0.000439775	0.000476438	0.000528044	0.000878222	0.000671878
standard deviation for YFP	0.00112878	0.00192433	0	0.0042588	0.00459682	0.0043273	0.00603534	0.00306252	0.00399182	0.00429577	0.00423525	0.00535114	0.00948698	0.0156602	0.0108113
Media: M9 Acetate (Trial 2)
Foldchange in mCherry (mean of datapoints in bin)	0.0190754	0.0356303	0.0631308	0.0879954	0.112597	0.134541	0.158143	0.18028
Foldchange in YFP (mean of datapoints in bin)	0.0381314	0.0472037	0.0867121	0.10823	0.129967	0.143752	0.165828	0.176847
standard deviation for mcherry	0.000403133	0.000644416	0.0011414	0.000901941	0.000653809	0.000562944	0.000649241	0.000786146
standard deviation for YFP	0.000952478	0.0019241	0.00613021	0.00377203	0.00308687	0.00375269	0.00446557	0.00533853
Media: M9 Acetate (Trial 3)
Foldchange in mCherry (mean of datapoints in bin)	0.0192864	0.0429073	0.0646472	0.0856221	0.10728	0.129734	0.151833	0.173959	0.195835	0.217286	0.24011
Foldchange in YFP (mean of datapoints in bin)	0.0297982	0.0537933	0.0737853	0.0984077	0.121442	0.142842	0.165868	0.186637	0.215578	0.241696	0.255663
standard deviation for mcherry	0.000262883	0.00113601	0.000425143	0.000390565	0.000408154	0.00043337	0.000507852	0.000537169	0.000729013	0.000885356	0.00116477
standard deviation for YFP	0.000708187	0.00366873	0.00169191	0.00234125	0.0027174	0.00311132	0.00336938	0.00434467	0.00744686	0.0150325	0.0380718

## Sheet: O2
Media: RDM (Trial 1)
AbsoluteFluorescene in mCherry (mean of datapoints in bin)	0	126060	156260	196768	249039
AbsoluteFluorescene in YFP (mean of datapoints in bin)	0	40453.7	42923.9	57025.7	67369.9
standard deviation for mcherry	0	785.585	731.782	937.755	1609.45
standard deviation for YFP	0	1357.16	912.124	1414.88	1964.82
Media: RDM (Trial 2)
AbsoluteFluorescene in mCherry (mean of datapoints in bin)	0	99530	124585	156654	199606	249185	312248
AbsoluteFluorescene in YFP (mean of datapoints in bin)	0	35374.6	41743.2	52588.5	64577.5	81752.6	99074.8
standard deviation for mcherry	0	487.901	536.269	578.984	671.03	893.072	1382.22
standard deviation for YFP	0	913.289	875.634	840.265	1021.64	1266.24	1886.59
Media: RDM (Trial 3)
AbsoluteFluorescene in mCherry (mean of datapoints in bin)	0	78632.2	99669.7	124891	156999	197874	248699	312322	395069
AbsoluteFluorescene in YFP (mean of datapoints in bin)	0	29979.5	33219.4	40653.2	50926.6	63269.9	78982.7	97435.2	122281
standard deviation for mcherry	0	421.698	378.724	358.901	395.38	468.002	614.996	1127.03	2456.07
standard deviation for YFP	0	984.712	594.282	562.099	602.338	681.043	883.371	1456.38	2936.29
Media: M9 Glucose (Trial 1)
AbsoluteFluorescene in mCherry (mean of datapoints in bin)	0	78025.9	99036	124212	157560	200254	251860	316764	396275	491195
AbsoluteFluorescene in YFP (mean of datapoints in bin)	0	29111.5	35529.9	41622.2	50465.9	57052.3	70091.9	85172.7	103456	127962
standard deviation for mcherry	0	440.955	445.788	448.944	485.935	499.141	595.305	697.755	1040.47	1983.77
standard deviation for YFP	0	1195.31	1256.64	991.279	875.788	843.674	917.11	987.971	1311.41	2993.84
Media: M9 Glucose (Trial 2)
AbsoluteFluorescene in mCherry (mean of datapoints in bin)	0	158974	198300	252971	316574	397533	498760
AbsoluteFluorescene in YFP (mean of datapoints in bin)	0	53623.9	60163.4	69949	81715.5	102527	127888
standard deviation for mcherry	0	750.78	832.626	739.28	902.772	1417.17	2701.26
standard deviation for YFP	0	1598.44	1428.66	1152.28	1290.56	1896.84	3706.03
Media: M9 Glucose (Trial 3)
AbsoluteFluorescene in mCherry (mean of datapoints in bin)	0	125148	158691	196955	250582	316029	396738
AbsoluteFluorescene in YFP (mean of datapoints in bin)	0	42998.5	58330.1	66845.5	87742.8	107731	127392
standard deviation for mcherry	0	847.091	957.161	1095.3	1151.43	1543.45	2174.49
standard deviation for YFP	0	1387.9	2087.65	1819.04	2044	2478.95	3761.01
Media: M9 Glycerol (Trial 1)
AbsoluteFluorescene in mCherry (mean of datapoints in bin)	0	62197.6	77179.6	97878.5	123228	156836	199208	251269	316703	396704	493149
AbsoluteFluorescene in YFP (mean of datapoints in bin)	0	32724.1	38068.2	41324.4	48811.6	56648.4	69914.4	81593.1	97338.5	114749	135473
standard deviation for mcherry	0	319.613	415.399	518.27	615.723	918.755	889.471	997.674	1143.55	1584.93	2471.33
standard deviation for YFP	0	1639.49	1589.38	1707.72	1967.59	2207.29	1910.24	1740.61	1787.5	2378.67	3862.33
Media: M9 Glycerol (Trial 2)
AbsoluteFluorescene in mCherry (mean of datapoints in bin)	0	76945.8	98168.1	125267	158425	197719	250312	313706	393634
AbsoluteFluorescene in YFP (mean of datapoints in bin)	0	37115.2	44955.5	53255	63801.1	66279.2	81887.9	103070	121960
standard deviation for mcherry	0	410.873	518.246	669.751	653.3	666.021	914.343	1256.37	2143.35
standard deviation for YFP	0	1246.34	1643.98	2209.66	1613.3	1224.9	1584.42	2105.04	3457.05
Media: M9 Glycerol (Trial 3)
AbsoluteFluorescene in mCherry (mean of datapoints in bin)	0	77561.3	98450.6	124592	157098	196082	251272	317326	394167
AbsoluteFluorescene in YFP (mean of datapoints in bin)	0	38246.9	42276.8	51638	67110.2	78485.7	100872	108019	141485
standard deviation for mcherry	0	507.378	526.212	628.394	660.249	818.52	949.56	1352.57	1922.22
standard deviation for YFP	0	1751.88	1460.44	1618.25	2172.82	2125.78	2754.31	2531.61	3504.07
Media: M9 Acetate (Trial 1)
AbsoluteFluorescene in mCherry (mean of datapoints in bin)	0	78876.9	98484.9	124400	156854	198113	251842	317838	400746	503895	631795	789710
AbsoluteFluorescene in YFP (mean of datapoints in bin)	0	44687.9	51555.4	58244.8	65217.7	75612.9	88544.8	104747	124965	150750	186125	224720
standard deviation for mcherry	0	381.542	328.342	364.244	410.722	491.568	587.396	691.01	780.206	1109.35	1975.51	4035.23
standard deviation for YFP	0	958.395	793.274	778.492	724.388	808.339	873.031	784.573	868.521	1133.59	1865.57	3570.16
Media: M9 Acetate (Trial 2)
AbsoluteFluorescene in mCherry (mean of datapoints in bin)	0	80183	99292.1	123395	154770	199228	250528	317456	399868	507048	634893	788934
AbsoluteFluorescene in YFP (mean of datapoints in bin)	0	47165.6	53704	62679.1	72086.1	83470.8	91074.2	110669	125811	148758	181231	221108
standard deviation for mcherry	0	411.902	411.423	430.918	511.566	715.582	910.755	1197.82	1487.31	1758.43	2522.55	4659.51
standard deviation for YFP	0	1113.2	950.885	1034.36	1163.21	1339.84	1442.88	1755.25	1556.58	1515.76	2119.74	5284.25
Media: M9 Acetate (Trial 3)
AbsoluteFluorescene in mCherry (mean of datapoints in bin)	0	124845	155844	199477	251651	318360	399138	510280	639002
AbsoluteFluorescene in YFP (mean of datapoints in bin)	0	66446.1	74995.5	88240	99914.5	113308	137468	158095	192251
standard deviation for mcherry	0	745.686	832.356	1152.85	1322.16	1598.59	1793.77	2466.18	3304.1
standard deviation for YFP	0	2005.17	1553.28	2102.49	3701.95	2260.49	2566.25	2543.77	3710.01

## Sheet: Oid
Media: RDM (Trial 1)
AbsoluteFluorescene in mCherry (mean of datapoints in bin)	0	77271.4	99330.8	124038
AbsoluteFluorescene in YFP (mean of datapoints in bin)	0	51157.2	57142.1	63816
standard deviation for mcherry	0	517.022	539.86	739.216
standard deviation for YFP	0	2522.76	2266.27	2631.21
Media: RDM (Trial 2)
AbsoluteFluorescene in mCherry (mean of datapoints in bin)	0	23984.9	30046.3	38098.8	48659.6	61148.3	76715.7	97463.1
AbsoluteFluorescene in YFP (mean of datapoints in bin)	0	16493.7	19913.4	26272.6	31508.5	36953.6	46151.1	56360.4
standard deviation for mcherry	0	153.161	181.168	222.018	258.404	289.59	354.73	499.99
standard deviation for YFP	0	851.311	1129.39	1112.36	1197.7	1222	1566.96	1746.05
Media: RDM (Trial 3)
AbsoluteFluorescene in mCherry (mean of datapoints in bin)	0	24227.9	30179.1	61747.7	78101.8	98914.3	123317	155714
AbsoluteFluorescene in YFP (mean of datapoints in bin)	0	16996	19372.5	35176.7	50381.3	58619.9	69367	83279.1
standard deviation for mcherry	0	140.938	180.172	352.266	338.134	363.405	406.008	603.593
standard deviation for YFP	0	865.789	834.487	1469.91	1442.02	1344.02	1489.76	2075.08
Media: M9 Glucose (Trial 1)
AbsoluteFluorescene in mCherry (mean of datapoints in bin)	0	15026	18923.7	23819.7	77931.4	98336.2	124193	156284
AbsoluteFluorescene in YFP (mean of datapoints in bin)	0	13981.7	12912.6	15443	43392	51427.1	63514.8	74763
standard deviation for mcherry	0	105.183	107.549	153.112	352.8	357.992	454.741	540.305
standard deviation for YFP	0	1239.46	1007.49	1070.18	2193.86	1736.33	2066.8	2364.46
Media: M9 Glucose (Trial 2)
AbsoluteFluorescene in mCherry (mean of datapoints in bin)	0	77734.7	97903.5	124266	155245
AbsoluteFluorescene in YFP (mean of datapoints in bin)	0	45394.9	53200.4	63549.5	80920.6
standard deviation for mcherry	0	428.789	495.791	591.834	783.692
standard deviation for YFP	0	2477.99	2856.35	2797.38	3284.84
Media: M9 Glucose (Trial 3)
AbsoluteFluorescene in mCherry (mean of datapoints in bin)	0	9569.33	11829.4	14886.2	18790.9	23909	29932	38025.3	48858.2	62242.7	77867.2	98660.8	124713	156300	195903	247196
AbsoluteFluorescene in YFP (mean of datapoints in bin)	0	12502.8	13254.1	12238.3	12172.2	13111	12807.4	18597.7	23428.6	29708.5	34484.4	45554.7	56167.5	64888.8	76102.6	89804.3
standard deviation for mcherry	0	66.6625	61.1924	70.9146	86.5512	113.66	168.084	238.632	324.791	291.576	289.959	287.613	326.712	402.142	603.655	1020.66
standard deviation for YFP	0	1123.63	1015.77	767.35	676.955	759.334	835.539	2587.37	1581.43	1539.14	1385.98	1481.89	1450.59	1744.59	2221.4	3437.65
Media: M9 Glycerol (Trial 1)
AbsoluteFluorescene in mCherry (mean of datapoints in bin)	0	11955.9	15025.4	18843.3	23720.9	30122.4	38077.5	48862.7	61937.6	78115.1	97940.4	123818	155654	196359	247186	311449
AbsoluteFluorescene in YFP (mean of datapoints in bin)	0	11906.6	11598.5	12892.2	13038.5	14234.8	14488.3	24187.3	33239.9	37893.9	43710.6	51705	63060.9	74775.5	89307.2	107406
standard deviation for mcherry	0	64.6948	60.4577	80.9947	111.379	164.201	251.827	289.752	285.062	277.381	298.337	371.704	503.928	699.726	1076.52	1716.42
standard deviation for YFP	0	1229.9	760.052	897.22	920.462	1080.66	1080.89	1957.73	1916.66	1443.34	1534.83	1575.15	2161.44	3561.64	3959.66	6086.35
Media: M9 Glycerol (Trial 2)
AbsoluteFluorescene in mCherry (mean of datapoints in bin)	0	78315.7	97757.6	124488	156183	197864	249119	314744
AbsoluteFluorescene in YFP (mean of datapoints in bin)	0	36985.6	49911.2	53827.9	74101.4	94664.9	103934	122172
standard deviation for mcherry	0	450.406	428.586	482.038	600.87	793.323	1157.45	1650.67
standard deviation for YFP	0	2099.81	2434.98	1741.42	2581.17	3186.6	3895.08	4873.04
Media: M9 Glycerol (Trial 3)
AbsoluteFluorescene in mCherry (mean of datapoints in bin)	0	19050.7	24048.1	61957.6	77968.8	98331.8	124304	156697	197002
AbsoluteFluorescene in YFP (mean of datapoints in bin)	0	10803.1	12932.6	30883.7	31888.3	40989.6	48580.5	58803.1	72945.3
standard deviation for mcherry	0	120.659	164.252	342.08	401.862	527.876	626.29	736.529	1069.88
standard deviation for YFP	0	863.021	1608.58	2407.08	2029.86	2209.2	2435.04	2848.19	3431.07
Media: M9 Acetate (Trial 1)
AbsoluteFluorescene in mCherry (mean of datapoints in bin)	0	15004.7	18949.7	24018.8	29924	37387.8	100427	126341	157930	198834	249249
AbsoluteFluorescene in YFP (mean of datapoints in bin)	0	11373.9	12649.4	13720.4	14996.5	17172.7	50726.7	56463.8	67543.4	79114.3	97548.4
standard deviation for mcherry	0	86.3674	77.8864	90.1926	124.032	193.076	652.092	397.987	337.334	370.262	503.986
standard deviation for YFP	0	554.619	427.721	544.483	543.308	836.758	1812.28	1007.44	809.049	805.637	957.909
Media: M9 Acetate (Trial 2)
AbsoluteFluorescene in mCherry (mean of datapoints in bin)	0	19410.1	23895.7	30303.6	38022.3	99534.2	123633	156250	199988	250216
AbsoluteFluorescene in YFP (mean of datapoints in bin)	0	13076.8	14761.3	15680.4	17298.2	40032	50847.3	62135	80246.9	97160.7
standard deviation for mcherry	0	102.545	125.327	144.304	208.476	510.99	566.596	602.488	695.252	873.982
standard deviation for YFP	0	704.545	638.881	617.286	908.121	1261.5	1488.87	1486.36	1346.53	1649.01
Media: M9 Acetate (Trial 3)
AbsoluteFluorescene in mCherry (mean of datapoints in bin)	0	19093.2	23901.9	78097.9	98217.1	125396	157599	199329	246308
AbsoluteFluorescene in YFP (mean of datapoints in bin)	0	10039.6	12088.8	31830.5	43380.4	52311	59595.3	71459.3	91899
standard deviation for mcherry	0	105	126.697	498.642	559.283	614.444	703.85	873.924	1461.93
standard deviation for YFP	0	563.324	658.762	1258.59	3224.24	1537.3	1427.92	1574.6	2731.33
