# Supplementary material for: Inherent regulatory asymmetry emanating from network architecture in a prevalent autoregulatory motif
Source: eLife. 2020 Aug 18;9:e56517. doi: 10.7554/eLife.56517 (PMC7505660; doi:10.7554/eLife.56517)
Supplement: Source data 1. — Data generated through simulations for Figure 2A-B , Figure 3B-D, Figure 4B-F and Figure 5A-C. [file elife-56517-data1.xlsx]

## Sheet: Sheet1
Simulation data for Figure 2, Figure 3, Figure 5
O1-O1 RDM					O1-O1 Glucose					O1-O1 Glycerol					O1-O1 Acetate
# Decoy	Fold change TF	Fold change target	Free TF		# Decoy	Fold change TF	Fold change target	Free TF		# Decoy	Fold change TF	Fold change target	Free TF		# Decoy	Fold change TF	Fold change target	Free TF
0	0.050045	0.058017	25.5297		0	0.030423	0.032386	37.3953		0	0.034622	0.035498	29.4823		0	0.03257	0.033041	30.1052
10	0.060172	0.081652	21.5619		10	0.034828	0.038452	33.2804		10	0.040631	0.042556	25.1307		50	0.066269	0.073108	14.7513
20	0.070914	0.113488	18.3229		20	0.039589	0.046997	29.7023		20	0.047434	0.051257	21.5706		100	0.106973	0.133526	8.60739
40	0.092685	0.182366	13.3821		40	0.049896	0.071239	23.952		40	0.062832	0.074838	16.3781		150	0.148279	0.193566	5.61797
60	0.114655	0.246637	10.1034		60	0.060913	0.10053	19.7693		60	0.079378	0.104537	12.8031		200	0.189	0.245325	4.02123
80	0.13586	0.30107	7.71043		80	0.072054	0.132245	16.4422		80	0.09629	0.136449	10.182		250	0.228534	0.289504	3.06298
100	0.156804	0.346457	6.08334		100	0.083195	0.163913	13.8128		100	0.113377	0.168253	8.27604		300	0.266848	0.327689	2.46051
150	0.207704	0.42599	3.6755		150	0.11088	0.233344	9.28911		150	0.155635	0.238776	5.27163		350	0.303607	0.362716	2.04051
200	0.256653	0.479823	2.50328		200	0.138188	0.28802	6.53269		200	0.197065	0.294108	3.71408		400	0.338977	0.394231	1.74497
250	0.303327	0.518646	1.87935		250	0.164843	0.330851	4.84226		250	0.237163	0.339627	2.7945
300	0.348025	0.54906	1.51445		300	0.19106	0.365716	3.78303		300	0.275905	0.376658	2.22372
350	0.391602	0.572124	1.28578		350	0.21659	0.394911	3.04095		350	0.313296	0.409894	1.85656
400	0.430233	0.594238	1.10835		400	0.24181	0.419169	2.5412		400	0.348878	0.439703	1.57665
450	0.468205	0.61469	0.98216		450	0.266619	0.439278	2.17747		450	0.382939	0.466562	1.38188
Oid-Oid RDM					Oid-Oid Glucose					Oid-Oid Glycerol					Oid-Oid Acetate
# Decoy	Fold change TF	Fold change target	Free TF		# Decoy	Fold change TF	Fold change target	Free TF		# Decoy	Fold change TF	Fold change target	Free TF		# Decoy	Fold change TF	Fold change target	Free TF
0	0.0341	0.058795	16.7516		0	0.01895	0.025706	22.5009		0	0.020236	0.023398	16.3335		0	0.018593	0.020118	16.2464
10	0.042835	0.122564	12.8829		10	0.023298	0.05023	18.6754		10	0.026449	0.041244	12.4494		50	0.052081	0.110327	5.07479
20	0.05156	0.18384	10.1731		20	0.027678	0.081613	15.526		20	0.033318	0.06853	9.71647		100	0.086778	0.184781	2.46898
40	0.067648	0.276317	6.53114		40	0.036456	0.143517	11.1032		40	0.047205	0.126829	6.16843		150	0.120032	0.23025	1.59905
60	0.082989	0.339524	4.44705		60	0.04487	0.195534	8.09612		60	0.06104	0.174678	4.21649		200	0.151501	0.265006	1.1971
80	0.09795	0.384446	3.21968		80	0.053212	0.237206	6.16594		80	0.074475	0.211713	3.0304		250	0.181442	0.290929	0.98377
100	0.112962	0.4172	2.47212		100	0.061405	0.268935	4.73785		100	0.087774	0.239979	2.3439		300	0.209712	0.315073	0.84245
150	0.149056	0.471751	1.52126		150	0.081359	0.325618	2.84038		150	0.120468	0.288383	1.50107		350	0.236783	0.33684	0.74342
200	0.185262	0.502961	1.11185		200	0.10116	0.360796	1.96887		200	0.151751	0.321642	1.12458		400	0.261776	0.357181	0.66487
250	0.219795	0.524815	0.8902		250	0.120622	0.386725	1.49477		250	0.181345	0.34714	0.91445		450	0.285626	0.374782	0.60292
300	0.253674	0.539938	0.7679		300	0.139367	0.406097	1.20533		300	0.210036	0.368315	0.78667		500	0.308236	0.393496	0.55008
350	0.285527	0.554529	0.67201		350	0.157735	0.421056	1.03382		350	0.236915	0.387811	0.69652
400	0.316219	0.569145	0.6091		400	0.176069	0.434583	0.91763		400	0.262484	0.405972	0.6256
450	0.344335	0.579627	0.56263		450	0.193923	0.446063	0.82521		450	0.28691	0.421882	0.57366
O2-O2 RDM					O2-O2 Glucose					O2-O2 Glycerol					O2-O2 Acetate
# Decoy	Fold change TF	Fold change target	Free TF		# Decoy	Fold change TF	Fold change target	Free TF		# Decoy	Fold change TF	Fold change target	Free TF		# Decoy	Fold change TF	Fold change target	Free TF
0	0.136669	0.137299	73.4529		0	0.090179	0.090195	115.152		0	0.105782	0.105902	94.6414		0	0.10149	0.10152	98.5268
10	0.145645	0.146392	68.5125		10	0.093969	0.094116	110.126		10	0.111177	0.111244	89.6239		10	0.106425	0.106497	93.4631
20	0.15511	0.156208	63.8557		20	0.097889	0.098119	105.272		20	0.116782	0.11696	84.8017		20	0.111572	0.111701	88.6075
40	0.175794	0.177111	55.5712		40	0.10627	0.106766	96.2801		40	0.128892	0.128937	75.9908		40	0.122681	0.122672	79.7201
60	0.198289	0.201011	48.3713		60	0.115411	0.115736	88.2937		60	0.141934	0.142347	68.0622		60	0.134595	0.134718	71.6568
80	0.22282	0.226217	42.3943		80	0.125081	0.125572	81.0189		80	0.155952	0.156299	61.0499		80	0.147414	0.147568	64.512
100	0.248414	0.254229	37.1644		100	0.135173	0.135869	74.3234		100	0.170879	0.171265	54.8952		100	0.161095	0.16121	58.234
150	0.316537	0.328142	27.1834		150	0.162772	0.164247	60.7745		150	0.211331	0.212429	42.5653		150	0.198057	0.198463	45.4316
200	0.387647	0.405539	20.2582		200	0.192587	0.195336	50.3293		200	0.255203	0.257184	33.6392		200	0.23825	0.238997	36.0491
250	0.458317	0.481483	14.9838		250	0.224106	0.22863	42.3618		250	0.301103	0.304568	26.9552		250	0.280571	0.281537	29.0382
300	0.527791	0.55266	11.1546		300	0.256496	0.263382	35.9121		300	0.348333	0.352843	21.9623		300	0.324244	0.325978	23.7087
350	0.593869	0.62034	8.24189		350	0.289564	0.298904	30.7404		350	0.39587	0.402668	17.8702		350	0.368703	0.371311	19.566
400	0.656159	0.679291	6.1486		400	0.322957	0.33558	26.4141		400	0.443661	0.451725	14.6739		400	0.413415	0.41685	16.204
450	0.712595	0.732455	4.58583		450	0.3565	0.371498	22.7953		450	0.491234	0.500123	12.0959		450	0.458269	0.462216	13.5506
O1-O2 Glucose					O1-Oid Glucose
# Decoy	Fold change TF	Fold change target	Free TF		# Decoy	Fold change TF	Fold change target	Free TF
0	0.030324	0.244147	37.4809		0	0.030475	0.012229	37.4432
50	0.055252	0.40379	21.8501		50	0.055413	0.036684	21.7396
100	0.08301	0.547303	13.8805		100	0.083218	0.07632	13.756
150	0.110687	0.649507	9.30397		150	0.110918	0.113571	9.2253
200	0.137786	0.71885	6.53104		200	0.138207	0.143467	6.56339
250	0.164501	0.767302	4.85056		250	0.164827	0.169189	4.8156
300	0.190861	0.801232	3.77507		300	0.191223	0.190371	3.78993
350	0.216485	0.825965	3.03805		350	0.216892	0.208251	3.03595
400	0.241802	0.844999	2.55312		400	0.242068	0.224487	2.53976
Simulation data for Figure 4
Oid-Oid RDM					Oid-Oid Glucose						Oid-Oid Glycerol					Oid-Oid Acetate
# Decoy	FC Target - FC TF	S3-S2	Kon *(n2-n3)/(koff + gamma)		# Decoy	FC Target - FC TF	S3-S2	Kon *(n2-n3)/(koff + gamma)			# Decoy	FC Target - FC TF	S3-S2	Kon *(n2-n3)/(koff + gamma)		# Decoy	FC Target - FC TF	S3-S2	Kon *(n2-n3)/(koff + gamma)
100	0.315534	0.315824	0.31007		100	0.215598	0.215653	0.210102			100	0.156534	0.156449	0.154		100	0.0929367	0.093232	0.090067
200	0.323499	0.323945	0.320337		200	0.268232	0.268038	0.26059			200	0.172868	0.171914	0.175735		200	0.105756	0.105557	0.105874
300	0.292194	0.291456	0.291561		300	0.272034	0.272873	0.264124			300	0.161039	0.161247	0.160679		300	0.098657	0.098435	0.0979021
400	0.256325	0.257102	0.252015		400	0.26255	0.263177	0.254971			400	0.145186	0.146231	0.145276		400	0.0885283	0.089092	0.0839106
500	0.222228	0.222993	0.219544		500	0.248482	0.249204	0.249574			500	0.129971	0.130338	0.128579		500	0.0792079	0.079393	0.0751723
600	0.190963	0.190609	0.191056		600	0.23323	0.232583	0.230771			600	0.116118	0.115644	0.117206		600	0.0707093	0.070304	0.0690415
700	0.164958	0.164887	0.16303		700	0.218187	0.219329	0.21556			700	0.104128	0.103503	0.1038		700	0.0631407	0.06307	0.0608011
800	0.142734	0.141001	0.144055		800	0.203923	0.20412	0.203005			800	0.0934222	0.094887	0.0918324		800	0.0571671	0.057733	0.0565085
900	0.124717	0.124993	0.125086		900	0.19055	0.190789	0.189462			900	0.0838918	0.08374	0.0841206		900	0.0515239	0.050785	0.0511181
1000	0.108679	0.109483	0.107519		1000	0.177569	0.17702	0.173855			1000	0.0762503	0.076509	0.0755559		1000	0.046953	0.047601	0.0410904
O1-O1 RDM					O1-O1 Glucose						O1-O1 Glycerol					O1-O1 Acetate
# Decoy	FC Target - FC TF	S3-S2	Kon *(n2-n3)/(koff + gamma)		# Decoy	FC Target - FC TF	S3-S2	Kon *(n2-n3)/(koff + gamma)			# Decoy	FC Target - FC TF	S3-S2	Kon *(n2-n3)/(koff + gamma)		# Decoy	FC Target - FC TF	S3-S2	Kon *(n2-n3)/(koff + gamma)
100	0.196217	0.196235	0.194436		100	0.081725	0.081075	0.0855838			100	0.056142	0.05566	0.0573285		100	0.026721	0.027065	0.0246487
200	0.231213	0.230647	0.233145		200	0.155628	0.155173	0.154038			200	0.100188	0.099737	0.100281		200	0.0569835	0.056652	0.0568938
300	0.204801	0.204966	0.204438		300	0.180969	0.181536	0.177769			300	0.103368	0.103625	0.102076		300	0.0616628	0.062984	0.0587864
400	0.167028	0.166571	0.167568		400	0.181996	0.18286	0.179372			400	0.0919528	0.092001	0.0929592		400	0.0556934	0.055313	0.056063
500	0.132133	0.131614	0.132485		500	0.17209	0.171651	0.173705			500	0.0776333	0.078781	0.0763832		500	0.0469791	0.046723	0.0490003
600	0.103422	0.102621	0.104012		600	0.158193	0.158293	0.156406			600	0.0637029	0.063005	0.0638677		600	0.0388407	0.038849	0.0381127
700	0.0812533	0.080999	0.0821446		700	0.142264	0.143498	0.139444			700	0.051966	0.051074	0.0514728		700	0.0317821	0.032264	0.0313841
800	0.0651189	0.064779	0.0647554		800	0.126806	0.126791	0.12556			800	0.0421966	0.043268	0.0421509		800	0.0258658	0.026092	0.0252604
900	0.0521651	0.053215	0.0513438		900	0.112397	0.113087	0.109946			900	0.0344864	0.034266	0.0353193		900	0.0211543	0.022285	0.0207623
1000	0.0432789	0.042398	0.0432662		1000	0.0992606	0.099576	0.0988729			1000	0.0283715	0.027999	0.0278022		1000	0.017437	0.016658	0.0182942
O2-O2 RDM					O2-O2 Glucose						O2-O2 Glycerol					O2-O2 Acetate
# Decoy	FC Target - FC TF	S3-S2	Kon *(n2-n3)/(koff + gamma)		# Decoy	FC Target - FC TF	S3-S2	Kon *(n2-n3)/(koff + gamma)			# Decoy	FC Target - FC TF	S3-S2	Kon *(n2-n3)/(koff + gamma)		# Decoy	FC Target - FC TF	S3-S2	Kon *(n2-n3)/(koff + gamma)
100	0.00537967	0.005568	0.00412124		100	0.000702206	0.000578	0.000663513			100	0.000486394	0.001321	-0.00337469		100	0.000208281	-0.000991	0.00669734
200	0.0185533	0.017028	0.020402		200	0.00252675	0.002845	0.0010681			200	0.00195174	0.002137	0.00164795		200	0.000834037	0.001444	-0.00151496
300	0.0279046	0.027858	0.0277162		300	0.00684204	0.006592	0.00675789			300	0.00500472	0.004324	0.00618904		300	0.0022469	0.003397	-0.000128507
400	0.0252937	0.024623	0.0254585		400	0.012644	0.012112	0.013197			400	0.00833483	0.008129	0.00926837		400	0.00399583	0.003515	0.00512078
500	0.016111	0.016437	0.0155378		500	0.018205	0.018408	0.0193222			500	0.0101514	0.009652	0.0102363		500	0.00538265	0.005802	0.00520576
600	0.00841354	0.007109	0.00849694		600	0.0222985	0.022144	0.021951			600	0.00979737	0.009861	0.0101534		600	0.00569571	0.005898	0.00520012
					700	0.0238792	0.023808	0.0236851			700	0.00761937	0.007726	0.00730006		700	0.00498092	0.005002	0.005034
					800	0.0233105	0.023753	0.0225648
					900	0.0205263	0.021872	0.019928
					1000	0.016536	0.01684	0.0163809
